# Supplementary material for: Photo-induced water oxidation with tetra-nuclear ruthenium sensitizer and catalyst: A unique 4 × 4 ruthenium interplay triggering high efficiency with low-energy visible light
Source: Royal Society of Chemistry journal article supplement (doi:10.1039/c0cc00444h), 2010-01-01
Supplement: c0cc00444h.pdf [file c0cc00444h.pdf]

# Photo-induced water oxidation with tetra-nuclear ruthenium sensitizer and catalyst: A unique 4x4 ruthenium interplay triggering high efficiency under visible light irradiation

Fausto Puntoriero, Giuseppina La Ganga, Andrea Sartorel, Mauro Carraro, Gianfranco Scorrano, Marcella Bonchio and Sebastiano Campagna

5

## Electronic Supplementary Information

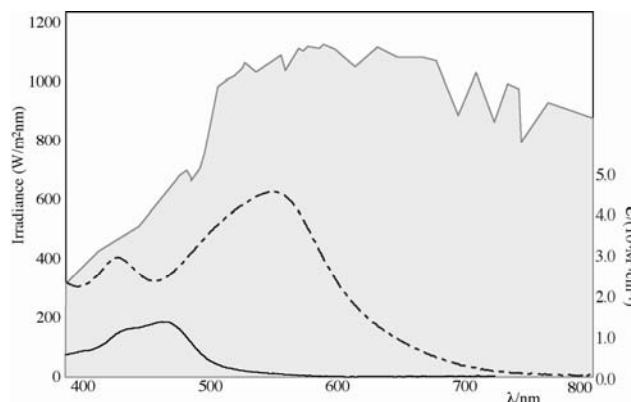

10 **Fig. S1** Comparison between solar spectrum at the sea level (visible region, grey area) and the acetonitrile absorption spectra of **1** (dashed-dotted) and of Ru(bpy)<sub>3</sub><sup>2+</sup> (solid line).

## Evolved oxygen measurement and quantum yield determination

The amount of O<sub>2</sub> evolution was calculated by Stern-Volmer equation (eq. 1), following the reduction in the luminescence lifetime of a deoxygenated acetonitrile solution of [Ru(bpy)<sub>3</sub>]<sup>2+</sup> in a cuvette (the measuring compartment) to which the oxygen evolved in a second cuvette containing the 15 photocatalytic mixture (reaction compartment) was transferred, by using a gas-tight syringe. A quantitative calibration curve was used.

$$[\text{O}_2]_t = [(\tau^0/\tau_t) - 1]/k_q \tau^0 \quad (1)$$

20 In eq. 1,  $\tau^0$  and  $\tau_t$  are the luminescence lifetime of the measuring compartment cuvette before photocatalytic activity ( $t_0$  time) and at time  $t$ , respectively;  $[\text{O}_2]_t$  is the concentration of molecular oxygen in the measuring compartment cuvette at the time  $t$ , responsible for energy transfer quenching of the Ru(II) complex emission;  $\tau^0$  is the emission lifetime of [Ru(bpy)<sub>3</sub>]<sup>2+</sup> in deoxygenated acetonitrile (1.0  $\mu\text{s}$ ) in absence of any quencher;  $k_q$  is assumed to be the diffusion constant in 25 acetonitrile, approximated to  $10^9 \text{ s}^{-1}$ .

Photochemical quantum yield for oxygen production was obtained by eq. 2, on exciting at 550 nm.

$$\Phi(\text{O}_2) = (\text{moles of oxygen})/(\text{moles of photons absorbed}) \quad (2)$$

The moles of photons absorbed were calculated by considering the photon output of the irradiation lamp (on its turn measured by using Aberchrome 540 (**A**, see Figure) as the photochromic actinometer, see ref. 13 of the article for further details) and the absorption of the solution.

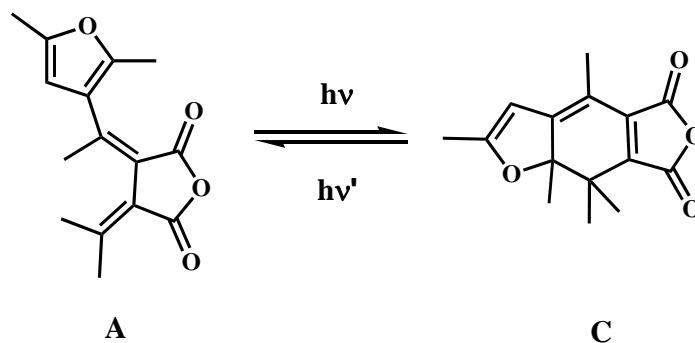

The number of moles of incident photons were calculated using eq. 3.

$$\frac{N h \nu}{t} = \frac{\Delta A \times V}{\phi_{\lambda} \times \varepsilon \times t \times F} \quad (3)$$

10 where  $\Delta A$  is the decrease in absorbance at 494 nm of a solution of **A** in dry toluene (after a suitable period of irradiation with UV light to obtain the closed form **C**),  $F$  is the mean fraction of light absorbed at the irradiation wavelength,  $\varepsilon$  is the molar absorption coefficient of **C** ( $8200 \text{ M}^{-1} \text{ cm}^{-1}$  at 494 nm),  $t$  is the time of irradiation and  $\phi$  is the quantum yield of the photocyclization reaction, calculated for the irradiation wavelength using eq. 4.

$$15 \quad \phi_{\lambda} = 0.178 - 2.4 \times 10^{-4} \cdot \lambda \quad (4)$$

## Equipment

Absorption spectra were recorded by a Jasco V560 spectrophotometer. Luminescence lifetimes were determined by time-correlated single-photon-counting Edinburgh OB900 spectrometer (light pulse: 20 Hamamatsu PL2 laser diode, pulse width 59 ps at 408 nm). For the light irradiation, a home-made system based on a halogen lamp (50 W) was used. Excitation wavelengths were selected with a cut-off filter (for the experiments shown in Fig. 1 of the paper) and with band-pass filters (for the photochemical quantum yield determinations).
